# Supplementary material for: Global reaction to the recent outbreaks of Zika virus: Insights from a Big Data analysis
Source: PubMed Central journal article supplement (PMC5608413; doi:10.1371/journal.pone.0185263), 2017-09-21
Supplement: pone.0185263.s002.pdf [file pone.0185263.s002.pdf]

| Country                           | RSV Microcephaly | Suspected autochthonous cases | Confirmed autochthonous cases | Incidence rate (per 100,000 inhabitants) | Imported cases | Population | HDI   |
|-----------------------------------|------------------|-------------------------------|-------------------------------|------------------------------------------|----------------|------------|-------|
| Guadeloupe                        | 100              | 0                             | 30775                         | 379                                      | 6614,44        | 471000     | 0,841 |
| Jamaica                           | 86               | 0                             | 6449                          | 122                                      | 234,43         | 2803000    | 0,719 |
| Trinidad & Tobago                 | 76               | 1                             | 0                             | 643                                      | 47,11          | 1365000    | 0,772 |
| Puerto Rico                       | 60               | 3                             | 0                             | 31464                                    | 854,77         | 3681000    | 0,838 |
| Honduras                          | 57               | 1                             | 31719                         | 285                                      | 390,77         | 8190000    | 0,606 |
| Dominican Republic                | 48               | 10                            | 4884                          | 328                                      | 48,94          | 10649      | 0,715 |
| Nicaragua                         | 44               | 0                             | 0                             | 2023                                     | 32,89          | 6150000    | 0,631 |
| Venezuela                         | 43               | 0                             | 58758                         | 2244                                     | 193,54         | 31519000   | 0,762 |
| Guatemala                         | 27               | 15                            | 2785                          | 466                                      | 19,5           | 16673000   | 0,627 |
| Brazil                            | 25               | 2079                          | 200465                        | 109596                                   | 147,95         | 209568000  | 0,755 |
| Panama                            | 24               | 5                             | 1959                          | 457                                      | 60,55          | 3990000    | 0,78  |
| Costa Rica                        | 23               | 1                             | 2450                          | 1355                                     | 78,34          | 4857000    | 0,766 |
| El Salvador                       | 23               | 4                             | 11305                         | 51                                       | 184,77         | 6146000    | 0,666 |
| Colombia                          | 22               | 54                            | 95929                         | 8826                                     | 215,31         | 48654000   | 0,72  |
| Bolivia                           | 19               | 3                             | 597                           | 128                                      | 6,6            | 10888000   | 0,662 |
| United States                     | 18               | 30                            | 0                             | 140                                      | 0,04           | 324119000  | 0,915 |
| Mexico                            | 16               | 0                             | 0                             | 5854                                     | 4,55           | 128632000  | 0,756 |
| Canada                            | 15               | 1                             | 0                             | 0                                        | 0              | 36286000   | 0,913 |
| Paraguay                          | 15               | 2                             | 546                           | 12                                       | 8,3            | 6725000    | 0,679 |
| Ecuador                           | 12               | 0                             | 2722                          | 806                                      | 21,53          | 16385000   | 0,732 |
| Uruguay                           | 12               | 0                             | 0                             | 0                                        | 0              | 344000     | 0,793 |
| Chile                             | 9                | 0                             | 0                             | 0                                        | 0              | 18132000   | 0,832 |
| Peru                              | 9                | 0                             | 0                             | 124                                      | 0,4            | 31374000   | 0,734 |
| Argentina                         | 8                | 0                             | 1821                          | 26                                       | 4,21           | 43847000   | 0,836 |
| Anguilla                          | 0                | 0                             | 38                            | 5                                        | 252,94         | 17000      | 0,809 |
| Antigua and Barbuda               | 0                | 0                             | 393                           | 14                                       | 432,98         | 94000      | 0,783 |
| Aruba                             | 0                | 0                             | 614                           | 28                                       | 563,16         | 114000     | 0,839 |
| Bahamas                           | 0                | 0                             | 0                             | 16                                       | 4,07           | 393000     | 0,79  |
| Barbados                          | 0                | 0                             | 625                           | 30                                       | 255,09         | 291000     | 0,785 |
| Belize                            | 0                | 0                             | 537                           | 49                                       | 159,67         | 367000     | 0,715 |
| Bermuda                           | 0                | 0                             | 0                             | 0                                        | 0              | 71000      | 0,901 |
| Bonaire, St Eustatius and Saba    | 0                | 0                             | 0                             | 85                                       | 340            | 25000      | 0,823 |
| Cayman Islands                    | 0                | 0                             | 201                           | 29                                       | 403,51         | 57000      | 0,887 |
| Curacao                           | 0                | 0                             | 0                             | 322                                      | 216,11         | 149000     | 0,825 |
| Cuba                              | 0                | 0                             | 0                             | 3                                        | 0,03           | 11393000   | 0,769 |
| Dominica                          | 0                | 0                             | 1150                          | 79                                       | 1660,81        | 74000      | 0,724 |
| French Guiana                     | 0                | 10                            | 9940                          | 483                                      | 3776,45        | 276000     | 0,816 |
| Grenada                           | 0                | 1                             | 313                           | 100                                      | 372,07         | 11000      | 0,75  |
| Guyana                            | 0                | 0                             | 0                             | 6                                        | 0,78           | 771000     | 0,636 |
| Haiti                             | 0                | 1                             | 2955                          | 5                                        | 27,29          | 10848000   | 0,483 |
| Martinique                        | 0                | 12                            | 36590                         | 12                                       | 9242,93        | 396000     | 0,884 |
| Montserrat                        | 0                | 0                             | 0                             | 0                                        | 0              | 5000       | 0,731 |
| Saint Barthelemy                  | 0                | 0                             | 820                           | 61                                       | 9788,89        | 9000       | 0,876 |
| Saint Kitts and Nevis             | 0                | 0                             | 472                           | 17                                       | 940,38         | 52000      | 0,752 |
| Saint Lucia                       | 0                | 0                             | 822                           | 50                                       | 531,71         | 164000     | 0,729 |
| Saint Martin                      | 0                | 0                             | 2670                          | 200                                      | 7972,22        | 36000      | 0,821 |
| Saint Vincenti and the Grenadines | 0                | 0                             | 156                           | 38                                       | 190,2          | 102000     | 0,72  |
| Sint Maarten                      | 0                | 0                             | 168                           | 62                                       | 560,98         | 41000      | 0,83  |
| Suriname                          | 0                | 2                             | 2751                          | 723                                      | 633,94         | 548000     | 0,714 |
| Turks and Caicos Islands          | 0                | 0                             | 115                           | 12                                       | 249,02         | 51000      | 0,826 |
| United Kingdom Virgin Islands     | 0                | 0                             | 51                            | 38                                       | 261,76         | 34000      | 0,808 |
| United States Virgin Islands      | 0                | 0                             | 803                           | 462                                      | 1228,16        | 103000     | 0,851 |
